# Supplementary material
Source: PubMed Central journal article supplement (PMC5649346)

**Supplementary Figures 1–3.** Scatterplots of cognitive fatigability (response speed variability [RSV]) and the (Figure 1) physical domain, (Figure 2) cognitive domain, and (Figure 3) summary scale scores of the NFI-MS. NFI-MS, Neurological Fatigue Index (NFI-MS); RSV, Response Speed Variability.

**Supplementary Figure 1.**

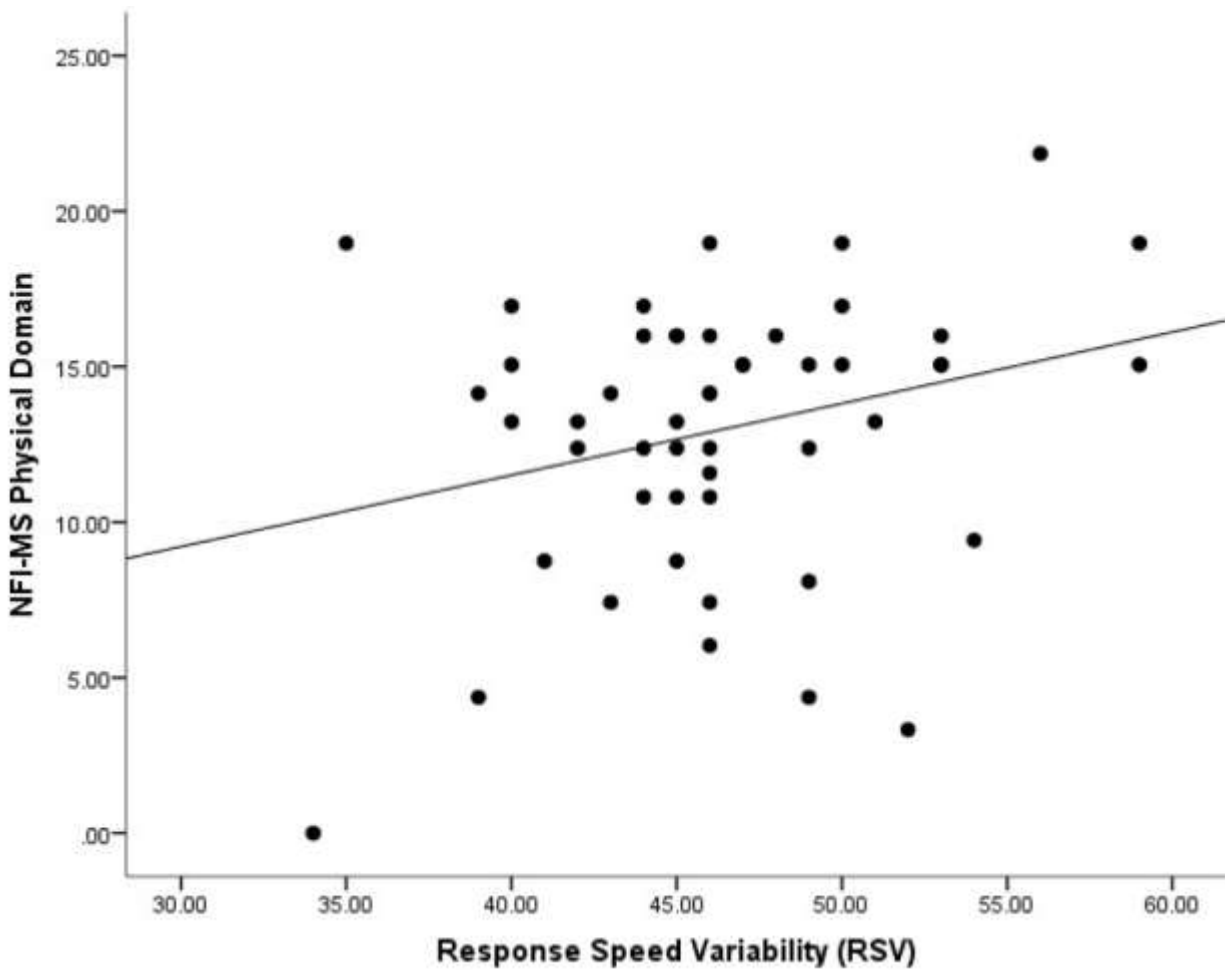

**Supplementary Figure 2.**

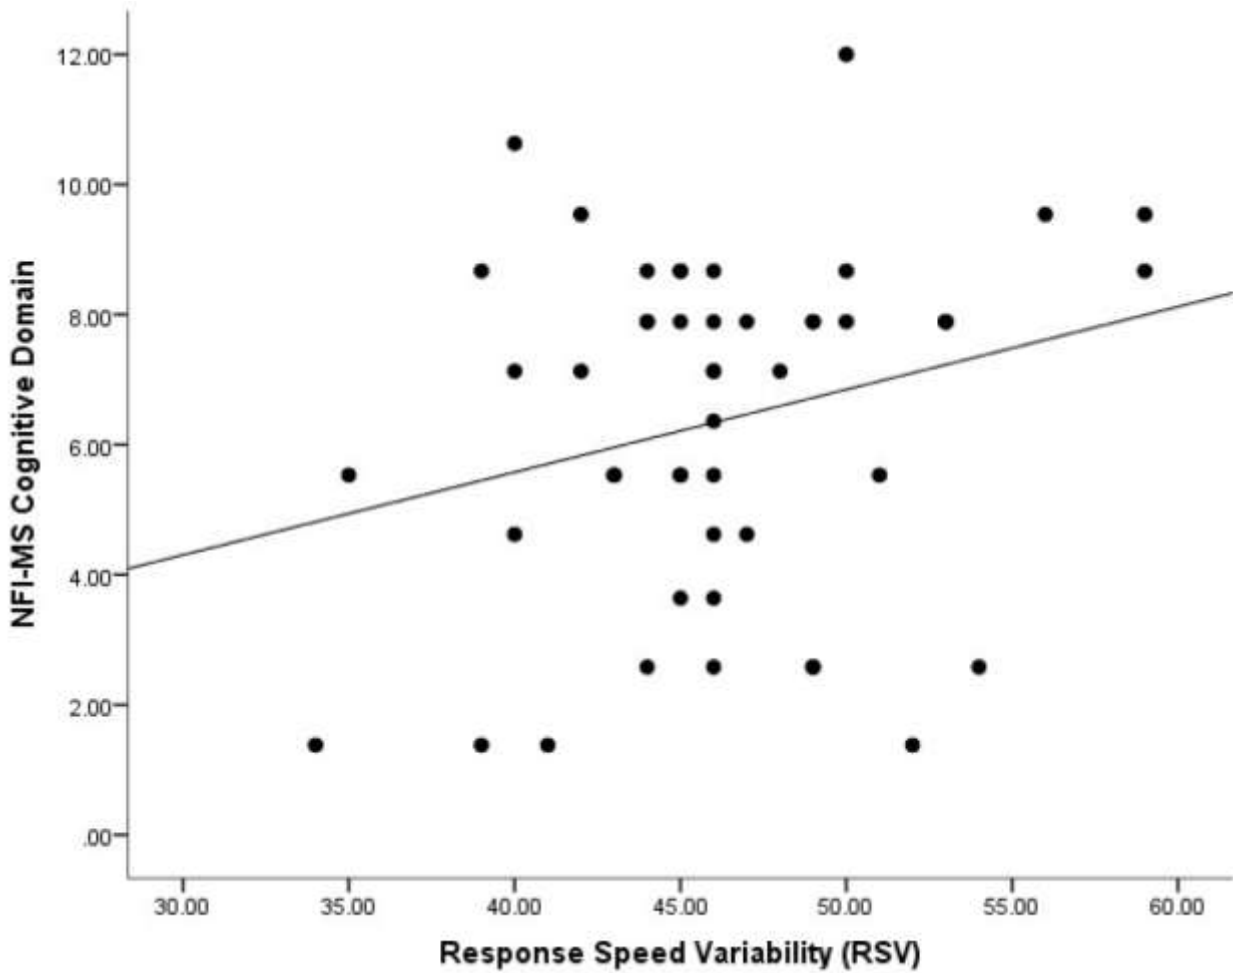

**Supplementary Figure 3.**

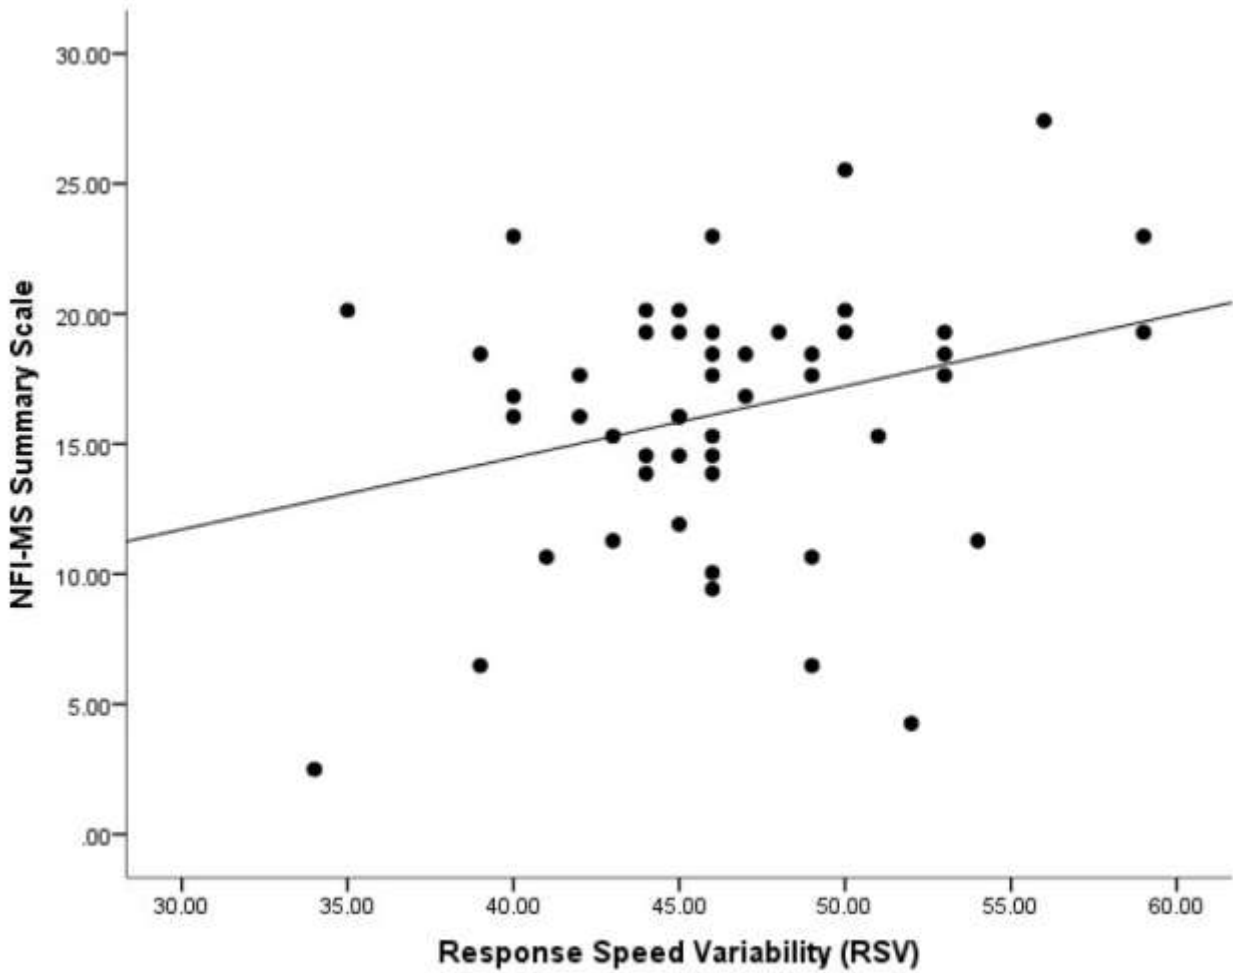

Supplement: 10.7224_2016-059.s1.pdf [file 10.7224_2016-059.s1.pdf]
